# Supplementary material
Source: Research Square preprint supplement (doi:10.21203/rs.3.rs-9161142/v1)
Supplement: Supplementary file 1 [file 032d0f9025912f89025bba33.pdf]

**Comments or questions?**

**Please contact us:**

USDA Forest Service  
National Woodland Owner Survey  
160 Holdsworth Way  
Amherst, MA 01003  
Toll-Free Telephone: (855) 233-3372  
Email: [nwos@fs.fed.us](mailto:nwos@fs.fed.us)  
Fax: (413) 545-1860  
Internet: [www.fia.fs.fed.us/nwos](http://www.fia.fs.fed.us/nwos)

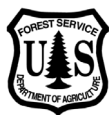

The U.S. Department of Agriculture (USDA) prohibits discrimination in all its programs and activities on the basis of race, color, national origin, gender, religion, age, disability, political beliefs, sexual orientation, and marital or family status. (Not all prohibited bases apply to all programs.) Persons with disabilities who require alternative means for communication of program information (Braille, large print, audiotape, etc.) should contact USDA's TARGET Center at 202-720-2600 (voice and TDD).

To file a complaint of discrimination, write USDA, Director, Office of Civil Rights, 1400 Independence Avenue, SW, Washington, DC 20250-9410 or call (800) 795-3272 (voice) or (202) 720-6382 (TDD). USDA is an equal opportunity provider and employer.

Version: Massachusetts VSM 8.0

# *National Woodland Owner Survey*

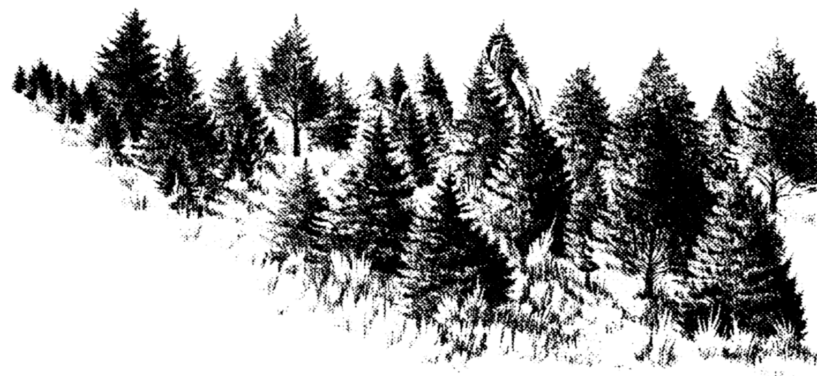

**USDA Forest Service, National Woodland Owner Survey**

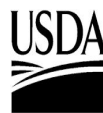

160 Holdsworth Way, Amherst MA 01003

Phone (toll-free): (855) 233-3372

Email: [nwos@fs.fed.us](mailto:nwos@fs.fed.us)

Internet: [www.fia.fs.fed.us/nwos](http://www.fia.fs.fed.us/nwos)

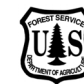

OMB No. 0596-0078

Approval Expires 11/30/2018

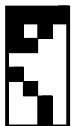

Draft

According to the Paperwork Reduction Act of 1995, an agency may not conduct or sponsor, and a person is not required to respond to a collection of information unless it displays a valid OMB control number. The valid OMB control number for this information collection is 0596-0078. The time required to complete this information collection is estimated to average 25 minutes per response, including the time for reviewing instructions, searching existing data sources, gathering and maintaining the data needed, and completing and reviewing the collection of information.

**Thank you for participating in this survey!**

Please return the survey in the postage-paid envelope provided.

If you would like a copy of the results of this survey, print your name and address on the back of the return envelope.

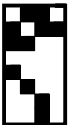

Draft

If there are any additional comments or concerns that you would like to share, please write them below.

## Instructions

- ✓ Please provide answers for all of the wooded land that you own in Massachusetts. If you are part of more than one group that owns wooded land, please respond for the group that is listed on the outside of the envelope.
- ✓ The owner who makes most of the decisions about your wooded land in Massachusetts should answer this survey.
- ✓ If this survey is received by a company or other organization, please have a person knowledgeable about the organization's wooded land in Massachusetts answer this survey. If the company listed on the envelope is a subsidiary of a larger company, please respond for the larger, parent company.

## General Questions About Your Land

1. How many total acres of land do you currently own in Massachusetts?

|  |  |  |  |  |  |  |  |
|--|--|--|--|--|--|--|--|
|  |  |  |  |  |  |  |  |
|--|--|--|--|--|--|--|--|

Acres of land in Massachusetts

2. Wooded land covers 63% of Massachusetts.

Wooded land includes:

- ✓ Woods, woodlots, timberland, and forests
- ✓ Land at least 1 acre in size, 120 feet wide, and has at least 10% forest cover
- ✓ Land at least 1 acre in size, where trees were removed and trees will grow again

Wooded land does *not* include:

- ✓ Christmas tree farms, orchards, or nurseries
- ✓ Land that is mowed for lawn

How many acres of wooded land do you currently own in Massachusetts?

|  |  |  |  |  |  |  |  |
|--|--|--|--|--|--|--|--|
|  |  |  |  |  |  |  |  |
|--|--|--|--|--|--|--|--|

Acres of wooded land in Massachusetts

*If you **own any** wooded land in Massachusetts, please complete this survey.*

*If you **do not own** wooded land in Massachusetts, please return this survey in the postage-paid envelope provided and write on the cover "No Wooded Land".*

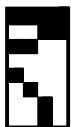

Draft

## General Questions about Your Ownership

3. Which category below best describes your ownership?  
*Select only one.*
- Individual
- Joint, with husband or wife
- Joint, such as with other family members or friends
- Family partnership or family LLC or LLP
- Family trust or estate
- Corporation or business
- Other (please specify): \_\_\_\_\_
4. How many people are a part of this ownership, including you?
- Owners
5. Do you currently own more than one separate, unconnected property with wooded land in Massachusetts?
- Yes  No
6. Is your home (primary residence) on or within a mile of any of your wooded land in Massachusetts?
- Yes  No  Not Applicable
7. Do you have a vacation home or cabin on or within a mile of any of your wooded land in Massachusetts?
- Yes  No  Not Applicable
8. Do you own any land that is farmed or ranched within a mile of any of your wooded land in Massachusetts ?  
For the purpose of this survey, a farm or ranch is a place where, in most years, \$1,000 or more is earned from the sale of crops (other than forest products) or animals.
- Yes  No  Not applicable

## General Questions About You

This section asks questions about you to help us understand private forest owners more broadly. As with the rest of this survey, your responses are anonymous and will not be used to identify you. If you are responding on behalf of a company or other organization, skip this section.

37. What is your age?  Years
38. What is your gender?
- Male  Female
39. What is the highest degree or level of school you have completed?
- Less than 12th grade
- High school/GED
- Some college
- Associate degree
- Bachelor's degree
- Advanced degree
40. Are you of Hispanic or Latino origin?
- Yes  No
41. What is your race?  
*Select one or more.*
- American Indian or Alaska Native
- Asian
- Black or African-American
- Native Hawaiian or Other Pacific Islander
- White
42. On average, what percentage of your household's annual income comes from the wooded land that you own?
- Percent

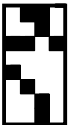

Draft

## Recreation on Your Wooded Land

35. a. Who, with your permission, has hunted, hiked, or otherwise recreated on your wooded land in Massachusetts in the past 5 years?

*Check all that apply.*

- Me and/or my husband or wife
- My children
- Other family members
- Friends
- Neighbors
- The general public for free
- The general public for a fee
- Other (please specify): \_\_\_\_\_
- Nobody → *If nobody, skip to question 24.*

- b. How did you/they recreate?

*Check all that apply.*

- Hunting
- Fishing
- Hiking/walking
- Bicycling
- Camping
- Horseback riding
- Skiing or snowshoeing
- Off-road vehicles, such as ATVs or snowmobiles
- Other (please specify): \_\_\_\_\_

36. Is any of your wooded land in Massachusetts posted to restrict access and/or use by the general public?

- Yes    No

## Your Reasons for Owning Wooded Land

9. How important are the following as reasons for why you currently own your wooded land in Massachusetts?

*If you own one property, select one box for each item.*

*If you own more than one property in Massachusetts, consider them all and check one or more boxes for each item.*

|                                                               | Very important           | Important                | Moderately important     | Of little importance     | Not important            | Not applicable           |
|---------------------------------------------------------------|--------------------------|--------------------------|--------------------------|--------------------------|--------------------------|--------------------------|
| To enjoy beauty or scenery                                    | <input type="checkbox"/> |
| To protect nature or biological diversity                     | <input type="checkbox"/> |
| To protect water resources                                    | <input type="checkbox"/> |
| To protect or improve wildlife habitat                        | <input type="checkbox"/> |
| For land investment                                           | <input type="checkbox"/> |
| For privacy                                                   | <input type="checkbox"/> |
| To raise my family                                            | <input type="checkbox"/> |
| To pass land on to my children or other heirs                 | <input type="checkbox"/> |
| For firewood                                                  | <input type="checkbox"/> |
| For timber products, such as logs or pulpwood                 | <input type="checkbox"/> |
| For nontimber forest products, such as berries or maple syrup | <input type="checkbox"/> |
| For hunting                                                   | <input type="checkbox"/> |
| For recreation, other than hunting                            | <input type="checkbox"/> |
| Other                                                         | <input type="checkbox"/> |
| ↳ (Please specify): _____                                     |                          |                          |                          |                          |                          |                          |

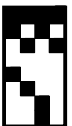

Draft

## The History of Your Wooded Land

10. a. How did you get your wooded land in Massachusetts?

*Select all that apply.*

- Purchased
- Inherited
- Received as gift
- Other (please specify): \_\_\_\_\_

b. From whom did you get your wooded land?

*Check all that apply.*

- My parents and/or my husband or wife's parents
- My husband or wife
- Another family member
- Other individual(s)
- A business
- A government agency
- Other (please specify): \_\_\_\_\_

c. In what year did you, personally, first take ownership of your wooded land in Massachusetts?

|  |  |  |  |  |      |
|--|--|--|--|--|------|
|  |  |  |  |  | Year |
|--|--|--|--|--|------|

11. Have you ever sold or given away any of your wooded land in Massachusetts?  Yes  No

## Uses of Your Wooded Land

12. Who makes the management decisions, such as whether or not to harvest trees, for your wooded land in Massachusetts?

*Check all that apply.*

- Me
- My husband or wife
- My children
- My parents
- Another family member
- My business partner
- My land manager or forester
- Other (please specify): \_\_\_\_\_

32. How much, if at all, do you enjoy that your wooded land in Massachusetts *could* provide **benefits or opportunities to you in the future**, regardless of whether or not you enjoy those benefits now?

- |                          |                          |                          |                          |                          |                          |
|--------------------------|--------------------------|--------------------------|--------------------------|--------------------------|--------------------------|
| Greatly<br>enjoy         | Moderately<br>enjoy      | Somewhat<br>enjoy        | Slightly<br>enjoy        | Do not<br>enjoy          | I don't<br>know          |
| <input type="checkbox"/> |

33. How much, if at all, do you enjoy knowing that your wooded land in Massachusetts is *currently* providing benefits to **other people** (besides yourself)?

- |                          |                          |                          |                          |                          |                          |
|--------------------------|--------------------------|--------------------------|--------------------------|--------------------------|--------------------------|
| Greatly<br>enjoy         | Moderately<br>enjoy      | Somewhat<br>enjoy        | Slightly<br>enjoy        | Do not<br>enjoy          | I don't<br>know          |
| <input type="checkbox"/> |

34. How much, if at all, do you enjoy knowing that your wooded land in Massachusetts *could* provide benefits to **other people** (besides yourself) in the future?

- |                          |                          |                          |                          |                          |                          |
|--------------------------|--------------------------|--------------------------|--------------------------|--------------------------|--------------------------|
| Greatly<br>enjoy         | Moderately<br>enjoy      | Somewhat<br>enjoy        | Slightly<br>enjoy        | Do not<br>enjoy          | I don't<br>know          |
| <input type="checkbox"/> |

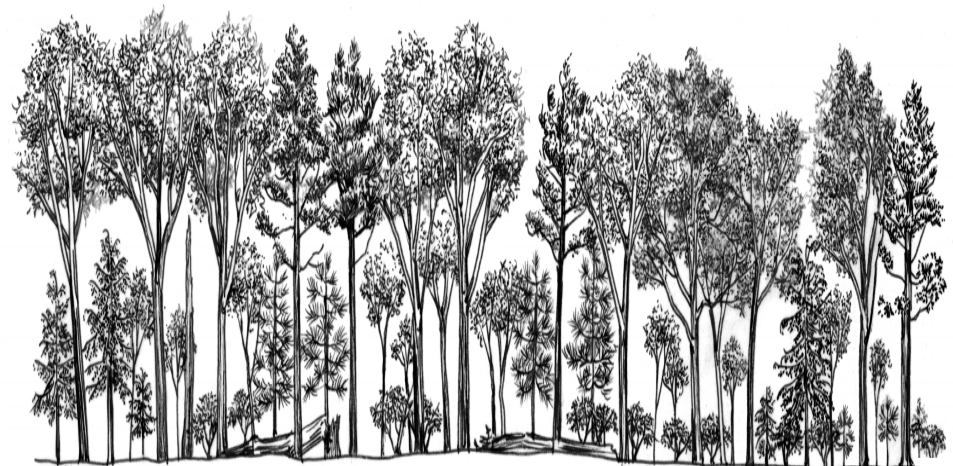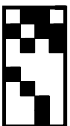

Draft

## The Value of Your Wooded Land

27. How much, if at all, do you enjoy the **beauty** that your wooded land in Massachusetts provides?

|                          |                          |                          |                          |                          |                          |
|--------------------------|--------------------------|--------------------------|--------------------------|--------------------------|--------------------------|
| Greatly enjoy            | Moderately enjoy         | Somewhat enjoy           | Slightly enjoy           | Do not enjoy             | I don't know             |
| <input type="checkbox"/> |

28. How much, if at all, do you enjoy the **peace and quiet** that your wooded land in Massachusetts provides?

|                          |                          |                          |                          |                          |                          |
|--------------------------|--------------------------|--------------------------|--------------------------|--------------------------|--------------------------|
| Greatly enjoy            | Moderately enjoy         | Somewhat enjoy           | Slightly enjoy           | Do not enjoy             | I don't know             |
| <input type="checkbox"/> |

29. How much, if at all, do you enjoy that your wooded land in Massachusetts provides and/or may provide **learning opportunities**?

|                          |                          |                          |                          |                          |                          |
|--------------------------|--------------------------|--------------------------|--------------------------|--------------------------|--------------------------|
| Greatly enjoy            | Moderately enjoy         | Somewhat enjoy           | Slightly enjoy           | Do not enjoy             | I don't know             |
| <input type="checkbox"/> |

30. How much, if at all, do you enjoy that your wooded land in Massachusetts provides **nature benefits**, such as habitat for plants and animals, carbon storage, and clean air and clean water?

|                          |                          |                          |                          |                          |                          |
|--------------------------|--------------------------|--------------------------|--------------------------|--------------------------|--------------------------|
| Greatly enjoy            | Moderately enjoy         | Somewhat enjoy           | Slightly enjoy           | Do not enjoy             | I don't know             |
| <input type="checkbox"/> |

31. How much, if at all, do you enjoy that your wooded land in Massachusetts **just exists**, regardless of any benefits that people may receive from it?

|                          |                          |                          |                          |                          |                          |
|--------------------------|--------------------------|--------------------------|--------------------------|--------------------------|--------------------------|
| Greatly enjoy            | Moderately enjoy         | Somewhat enjoy           | Slightly enjoy           | Do not enjoy             | I don't know             |
| <input type="checkbox"/> |

13. A management or stewardship plan may be written in order to help the landowner meet their goals for their wooded land.

a. How familiar are you with these types of plans?

|                          |                          |                          |                          |                          |
|--------------------------|--------------------------|--------------------------|--------------------------|--------------------------|
| Extremely familiar       | Moderately familiar      | Somewhat familiar        | Slightly familiar        | Not at all familiar      |
| <input type="checkbox"/> |

b. Do you have a written management or stewardship plan for any of your wooded land in Maine?

Yes    No    Don't know

↳ If no or don't know, skip to question 14  
↳ If yes, please answer c

c. Have you taken actions to implement it?

Yes    No

14. Have trees ever been cut or removed from any of your wooded land in Massachusetts since you have owned it?

Yes    No → If no, skip to question 15.

↳ If yes, please answer a, b, and c.

a. What types of products were harvested?

Check all that apply.

Firewood

Logs

Wood chips or pulpwood

Other (please specify): \_\_\_\_\_

b. Why were the trees cut or removed?

Check all that apply.

For Sale    For personal use    Other

d. Was a professional forester used to plan, mark, contract, or oversee any of the cuts?

Yes    No    Don't know    Not applicable

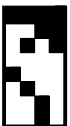

Draft

15. Which of the following have occurred on your wooded land in Massachusetts **in the past 5 years?**

*Check all that apply.*

- Cut and/or removed trees for sale
- Cut and/or removed trees for own use
- Collected nontimber forest products, such as berries or ginseng
- Reduced fire hazard
- Controlled burn/prescribed fire
- Eliminated or reduced invasive plants
- Eliminated or reduced unwanted insects or diseases
- Road construction or maintenance
- Trail construction or maintenance
- Improved wildlife habitat
- Livestock grazing
- Other (please specify): \_\_\_\_\_
- None of the above

16. Which of the following will likely occur on your wooded land in Massachusetts **in the next 5 years?**

*Check all that apply*

- Cut and/or remove trees for sale
- Cut and/or remove trees for own use
- Collect nontimber forest products, such as berries and ginseng
- Reduce fire hazard
- Controlled burn/prescribed fire
- Eliminate or reduce invasive plants
- Eliminate or reduce unwanted insects or diseases
- Road construction or maintenance
- Trail construction or maintenance
- Improve wildlife habitat
- Livestock grazing
- Other (please specify): \_\_\_\_\_
- None of the above
- Don't know

## The Future of Your Wooded Land

25. How likely is it that you will sell or give away any of your wooded land in Massachusetts in the next 5 years?

- |                          |                          |                          |                          |                          |
|--------------------------|--------------------------|--------------------------|--------------------------|--------------------------|
| Extremely<br>likely      | Likely                   | Undecided                | Unlikely                 | Extremely<br>unlikely    |
| <input type="checkbox"/> |

26. Please indicate your level of agreement with the following statements.

*Check one box for each item.*

|                                                            | Strongly agree           | Agree                    | Neither agree<br>nor disagree | Disagree                 | Strongly disagree        |
|------------------------------------------------------------|--------------------------|--------------------------|-------------------------------|--------------------------|--------------------------|
| I want my wooded land to stay wooded                       | <input type="checkbox"/> | <input type="checkbox"/> | <input type="checkbox"/>      | <input type="checkbox"/> | <input type="checkbox"/> |
| I would sell my land if I was offered a reasonable price   | <input type="checkbox"/> | <input type="checkbox"/> | <input type="checkbox"/>      | <input type="checkbox"/> | <input type="checkbox"/> |
| I know my wooded land very well                            | <input type="checkbox"/> | <input type="checkbox"/> | <input type="checkbox"/>      | <input type="checkbox"/> | <input type="checkbox"/> |
| I want to know more about my wooded land                   | <input type="checkbox"/> | <input type="checkbox"/> | <input type="checkbox"/>      | <input type="checkbox"/> | <input type="checkbox"/> |
| I have a strong emotional attachment to my wooded land     | <input type="checkbox"/> | <input type="checkbox"/> | <input type="checkbox"/>      | <input type="checkbox"/> | <input type="checkbox"/> |
| I believe my wooded land provides benefits to my community | <input type="checkbox"/> | <input type="checkbox"/> | <input type="checkbox"/>      | <input type="checkbox"/> | <input type="checkbox"/> |

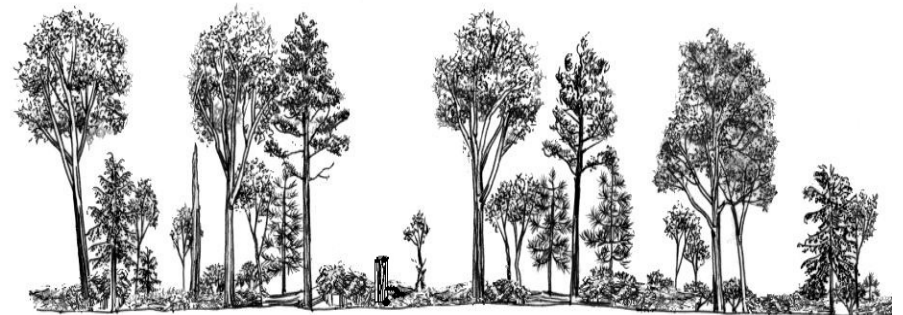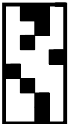

Draft

## Concerns

24. Please indicate your level of concern about each of the following topics for your wooded land in Massachusetts.

*If you own one property, check one box for each item.*

*If you own more than one property in Massachusetts, consider them all and check one or more boxes for each item.*

|                                                     | Great concern            | Concern                  | Moderate concern         | Of little concern        | No concern               | Not applicable           |
|-----------------------------------------------------|--------------------------|--------------------------|--------------------------|--------------------------|--------------------------|--------------------------|
| Air pollution                                       | <input type="checkbox"/> |
| Climate change                                      | <input type="checkbox"/> |
| Damage from animals                                 | <input type="checkbox"/> |
| Development of nearby lands                         | <input type="checkbox"/> |
| Drought or lack of water                            | <input type="checkbox"/> |
| Damage or noise from off-road vehicles              | <input type="checkbox"/> |
| Government regulations                              | <input type="checkbox"/> |
| High property taxes                                 | <input type="checkbox"/> |
| Invasive plants                                     | <input type="checkbox"/> |
| Keeping land intact for future generations          | <input type="checkbox"/> |
| Misuse of wooded land, such as vandalism or dumping | <input type="checkbox"/> |
| Trespassing or poaching                             | <input type="checkbox"/> |
| Unwanted insects or diseases                        | <input type="checkbox"/> |
| Water pollution                                     | <input type="checkbox"/> |
| Wildfire                                            | <input type="checkbox"/> |
| Wind or ice storms                                  | <input type="checkbox"/> |
| Other                                               | <input type="checkbox"/> |
| ↳ (Please specify):                                 | <input type="text"/>     |                          |                          |                          |                          |                          |

17. To encourage good woodland management, groups have created green certification programs to recognize landowners who comply with the groups' standards. Examples include Tree Farm, Forest Stewardship Council (FSC), and Sustainable Forestry Initiative (SFI).

a. How familiar are you with green certification?

Extremely familiar  Moderately familiar  Somewhat familiar  Slightly familiar  Not at all familiar

b. Is any of your wooded land in Massachusetts currently green certified?

Yes  No  Don't know

18. Some state and local governments have programs that defer, reduce, or eliminate property taxes for wooded land. In Massachusetts, there are the Chapter 61 and Chapter 61b programs.

a. How familiar are you with these programs?

Extremely familiar  Moderately familiar  Somewhat familiar  Slightly familiar  Not at all familiar

b. Is any of your wooded land in Massachusetts currently enrolled in one of these programs or something similar?

Yes  No  Don't know

19. Development rights for land can be sold or voluntarily given away. This is usually in the form of a conservation easement.

a. How familiar are you with this concept?

Extremely familiar  Moderately familiar  Somewhat familiar  Slightly familiar  Not at all familiar

b. Have development rights been sold or voluntarily given away on any of your wooded land in Massachusetts by either you or a previous owner?

Yes  No  Don't know

c. If No or Don't know, how likely are you to do so in the next 5 years?

Extremely likely  Likely  Undecided  Unlikely  Extremely unlikely  Not applicable

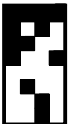

Draft

20. Cost-share programs provide landowners with money to help them establish or otherwise manage their wooded land. Examples include the Conservation Reserve Program, the Environmental Quality Incentives Program, the Wildlife Habitat Incentives Program, and various state funded programs.

a. How familiar are you with cost-share programs?

|                          |                          |                          |                          |                          |
|--------------------------|--------------------------|--------------------------|--------------------------|--------------------------|
| Extremely familiar       | Moderately familiar      | Somewhat familiar        | Slightly familiar        | Not at all familiar      |
| <input type="checkbox"/> |

b. In the **past 5 years**, have you used a cost-share program to help you establish or manage your wooded land in Massachusetts?

Yes  No  Don't know

21. In efforts to reduce the impacts of climate change, public programs and private markets have been created that pay owners of wooded land for capturing or sequestering carbon.

a. How familiar are you with carbon capture programs or markets?

|                          |                          |                          |                          |                          |
|--------------------------|--------------------------|--------------------------|--------------------------|--------------------------|
| Extremely familiar       | Moderately familiar      | Somewhat familiar        | Slightly familiar        | Not at all familiar      |
| <input type="checkbox"/> |

b. Is any of your wooded land in Massachusetts currently enrolled in one of these carbon capture programs or markets?

Yes  No  Don't know

22. Have you leased your wooded land in Massachusetts (other than for logging)?

Yes  No → *If no, skip to question 22.*

↳ *If yes, please answer a and b.*

a. What leasing activities did they use it for?

*Check all that apply.*

Hunting

Recreation (other than hunting)

To graze/pasture livestock

Other (please specify): \_\_\_\_\_

b. Have any of these leasing activities occurred on your land in the **past 5 years**?

Yes  No

23. a. Which, if any, of the following nontimber forest products have been collected from any of your wooded land in Massachusetts since you have owned it?

*Check all that apply.*

Edibles, such as berries or maple syrup

Medicinals, such as ginseng or St. John's wort

Landscaping, such as transplants

Decorative, such as boughs or birch bark

Other (please specify): \_\_\_\_\_

None of the above → *If none of the above, skip to question 24.*

b. Why were the nontimber forest products collected from your wooded land in Massachusetts?

*Check all that apply.*

For sale  For personal use  Other

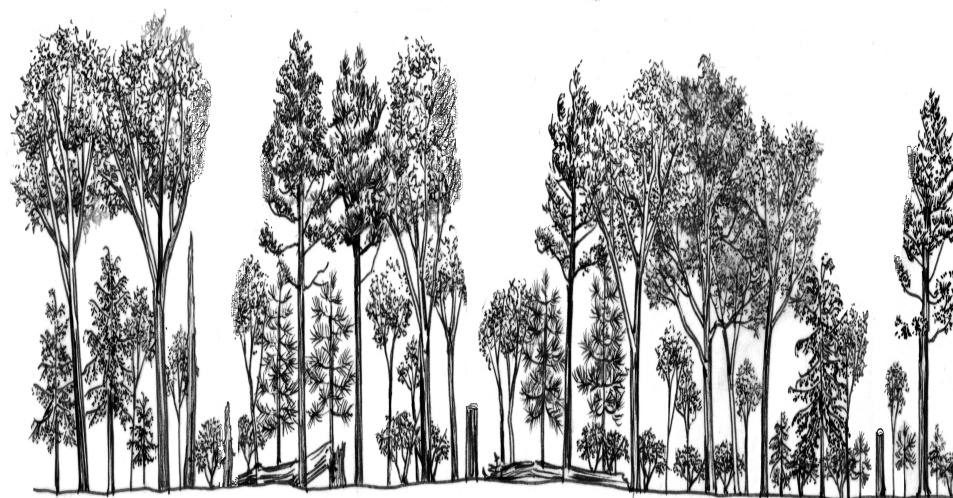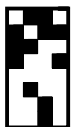

Draft
